# Supplementary material for: Suicide Research, Prevention, and COVID-19
Source: Atypon-hosted journal article supplement (doi:10.1027/0227-5910/a000731), 2020-07-27
Supplement: 0227-5910_a000731_esm_icsprc_members.pdf [file 0227-5910_a000731_esm_icsprc_members.pdf]

| Title | Name                   | Preferred Degree | Email address                                                                      | Author Affiliation 1                                                                                                                                       | Author Affiliation 2 |
|-------|------------------------|------------------|------------------------------------------------------------------------------------|------------------------------------------------------------------------------------------------------------------------------------------------------------|----------------------|
| Mgs   | Pablo Analuisa         | Mgs              | <a href="mailto:pablo.analuisa@msp.gob.ec">pablo.analuisa@msp.gob.ec</a>           | Ministerio de Salud Pública, Ecuador                                                                                                                       |                      |
| Prof  | Louis Appleby          | FRCPsych         | <a href="mailto:Louis.Appleby@manchester.ac.uk">Louis.Appleby@manchester.ac.uk</a> | Centre for Mental Health & Safety, University of Manchester, Manchester, UK                                                                                |                      |
| Prof  | Ella Arensman          | PhD              | <a href="mailto:ella.arensman@ucc.ie">ella.arensman@ucc.ie</a>                     | School of Public Health and National Suicide Research Foundation, College of Medicine and Health, University College Cork, Cork, Republic of Ireland       |                      |
| Prof  | Jose Luis Ayuso-Mateos | MD               | <a href="mailto:joseluis.ayuso@uam.es">joseluis.ayuso@uam.es</a>                   | Department of Psychiatry. Universidad Autonoma de Madrid. CIBERSAM. Spain                                                                                  |                      |
| Prof  | Jason Bantjes          | PhD              | <a href="mailto:jbantjes@sun.ac.za">jbantjes@sun.ac.za</a>                         | Department of Psychology, Stellenbosch University, South Africa                                                                                            |                      |
| Prof  | Jose Manoel Bertolote  | MD               | <a href="mailto:bertolote@gmail.com">bertolote@gmail.com</a>                       | Voluntary Professor - Botucatu Medical School, UNESP, Brazil                                                                                               |                      |
| Prof  | Eric Caine             | MD               | <a href="mailto:Eric_Caine@URMC.Rochester.edu">Eric_Caine@URMC.Rochester.edu</a>   | University of Rochester Med. Ctr, 300 Crittenden Blvd, Rochester, NY 14642-8409 USA                                                                        |                      |
| Dr    | Lai Fong Chan          | MD,<br>MMedPsych | <a href="mailto:laifchan@ppukm.ukm.edu.my">laifchan@ppukm.ukm.edu.my</a>           | Department of Psychiatry, Faculty of Medicine, National University of Malaysia (UKM), Kuala Lumpur, Malaysia.                                              |                      |
| Dr    | Shu-Sen Chang          | PhD              | <a href="mailto:shusen.chang@gmail.com">shusen.chang@gmail.com</a>                 | Institute of Health Behaviors and Community Sciences and Department of Public Health, College of Public Health, National Taiwan University, Taipei, Taiwan |                      |

|      |                       |         |                                                                                  |                                                                                                                                                                            |                                                                                                                                                                      |
|------|-----------------------|---------|----------------------------------------------------------------------------------|----------------------------------------------------------------------------------------------------------------------------------------------------------------------------|----------------------------------------------------------------------------------------------------------------------------------------------------------------------|
| Prof | Ying-Yeh Chen         | ScD     | <a href="mailto:ychen@tpech.gov.tw">ychen@tpech.gov.tw</a>                       | Taipei City Psychiatric Centre, Taipei City Hospital, Taipei, Taiwan                                                                                                       | Institute of Public Health and Department of Public Health, National Yang-Ming University, Taipei, Taiwan.                                                           |
| Prof | Helen Christensen     | PhD     | <a href="mailto:h.christensen@blackdog.org.au">h.christensen@blackdog.org.au</a> | Black Dog Institute, University of New South Wales, Randwick, New South Wales, Australia                                                                                   |                                                                                                                                                                      |
| Prof | Rakhi Dandona         | PhD     | <a href="mailto:rakhi.dandona@phfi.org">rakhi.dandona@phfi.org</a>               | Public Health Foundation of India, Plot 47, Sector 44, Gurgaon, 122002, National Capital Region, India                                                                     | Institute for Health Metrics and Evaluation, University of Washington, Seattle, USA                                                                                  |
| Prof | Diego De Leo          | MD      | <a href="mailto:diegodeleo1@gmail.com">diegodeleo1@gmail.com</a>                 | De Leo Fund, Padua, Italy (& Emeritus Professor AISRAP)                                                                                                                    |                                                                                                                                                                      |
| Prof | Michael Eddleston     | ScD     | <a href="mailto:m.eddleston@ed.ac.uk">m.eddleston@ed.ac.uk</a>                   | Centre for Pesticide Suicide Prevention, University of Edinburgh, Edinburgh, UK                                                                                            |                                                                                                                                                                      |
| Dr   | Annette Erlangsen     | PhD     | <a href="mailto:Annette.Erlangsen@regionh.dk">Annette.Erlangsen@regionh.dk</a>   | Danish Research Institute for Suicide Prevention, Mental Health Centre Copenhagen, Copenhagen, Denmark                                                                     | Department of Mental Health, Johns Hopkins University Bloomberg School of Public Health, Baltimore, Maryland, USA.                                                   |
| Prof | David Gunnell         | FMedSci | <a href="mailto:D.J.Gunnell@bristol.ac.uk">D.J.Gunnell@bristol.ac.uk</a>         | National Institute of Health Research Biomedical Research Centre, University Hospitals Bristol NHS Foundation Trust and the University of Bristol, Bristol, United Kingdom | National Institute of Health Research Biomedical Research Centre at the University Hospitals Bristol NHS Foundation Trust and the University of Bristol, Bristol, UK |
| Dr   | Jill Harkavy-Friedman | PhD     | <a href="mailto:jharkavyfriedman@afsp.org">jharkavyfriedman@afsp.org</a>         | American Foundation for Suicide Prevention, 199 Water Street, 11th floor, New York, NY 10038, USA                                                                          |                                                                                                                                                                      |
| Prof | Keith Hawton          | FMedSci | <a href="mailto:keith.hawton@psych.ox.ac.uk">keith.hawton@psych.ox.ac.uk</a>     | Centre for Suicide Research, Department of Psychiatry, Warneford Hospital, University of Oxford, UK                                                                        |                                                                                                                                                                      |

|      |                    |               |                                                                                          |                                                                                                                                                           |                                                                                                                                                                                                  |
|------|--------------------|---------------|------------------------------------------------------------------------------------------|-----------------------------------------------------------------------------------------------------------------------------------------------------------|--------------------------------------------------------------------------------------------------------------------------------------------------------------------------------------------------|
| Prof | Ann John           | FFPH          | <a href="mailto:a.john@swansea.ac.uk">a.john@swansea.ac.uk</a>                           | Population Psychiatry, Suicide and Informatics, Medical School, Swansea University, Swansea, UK                                                           |                                                                                                                                                                                                  |
| Prof | Fabrice Jollant    | MD, PhD       | <a href="mailto:fabrice.jollant@parisdescartes.fr">fabrice.jollant@parisdescartes.fr</a> | Department of Psychiatry, Université de Paris, Paris, France                                                                                              | GHU Paris Psychiatrie et Neurosciences, Paris, France                                                                                                                                            |
| Prof | Nav Kapur          | FRCPsych      | <a href="mailto:nav.kapur@manchester.ac.uk">nav.kapur@manchester.ac.uk</a>               | Division of Psychology & Mental Health, Centre for Mental Health and Safety, The University of Manchester, Manchester, UK                                 | Greater Manchester Mental Health NHS Foundation Trust & Greater Manchester NIHR Patient Safety Translational Research Centre, Manchester Academic Health Sciences Centre (MAHSC), Manchester, UK |
| Prof | Murad Khan         | MRCPsych, PhD | <a href="mailto:murad.khan@aku.edu">murad.khan@aku.edu</a>                               | Department of Psychiatry, Aga Khan University, Karachi, Pakistan                                                                                          |                                                                                                                                                                                                  |
| Dr   | Olivia Kirtley     | PhD           | <a href="mailto:olivia.kirtley@kuleuven.be">olivia.kirtley@kuleuven.be</a>               | Center for Contextual Psychiatry, KU Leuven, Department of Neuroscience, Campus Sint-Rafael, Kapucijnenvoer 33, Bus 7001 (Blok H), 3000, Leuven, Belgium. |                                                                                                                                                                                                  |
| Dr   | Duleeka Knipe      | PhD           | <a href="mailto:Dee.Knipe@bristol.ac.uk">Dee.Knipe@bristol.ac.uk</a>                     | Population Health Sciences, Bristol Medical School, University of Bristol, Canynge Hall, 39 Whatley Road, Bristol, BS8 2PS, UK                            |                                                                                                                                                                                                  |
| Dr   | Kairi Kolves       | PhD           | <a href="mailto:k.kolves@griffith.edu.au">k.kolves@griffith.edu.au</a>                   | Australian Institute for Suicide Research and Prevention, Griffith University, Australia                                                                  |                                                                                                                                                                                                  |
| Prof | Flemming Konradsen | PhD           | <a href="mailto:flko@sund.ku.dk">flko@sund.ku.dk</a>                                     | Department of Public Health, Faculty of Health and Medical Sciences, University of Copenhagen, Copenhagen, Denmark                                        |                                                                                                                                                                                                  |

|      |                           |         |                                                                                                            |                                                                                                                       |                                                                                                                                                                      |
|------|---------------------------|---------|------------------------------------------------------------------------------------------------------------|-----------------------------------------------------------------------------------------------------------------------|----------------------------------------------------------------------------------------------------------------------------------------------------------------------|
| Prof | Shiwei Liu                | PhD     | <a href="mailto:shiwei_liu@aliyun.com">shiwei_liu@aliyun.com</a>                                           | Chinese Center for Disease Control and Prevention, #155 Changbai Road, Changping District, 102206 Beijing, China      |                                                                                                                                                                      |
|      | Sally McManus             | MSc     | <a href="mailto:Sally.McManus@natcen.ac.uk">Sally.McManus@natcen.ac.uk</a>                                 | National Centre for Social Research, 35 Northampton Square, London EC1V 0AX, UK                                       | City, University of London, Northampton Square, London EC1V 0HB, UK                                                                                                  |
| Prof | Lars Mehlum               | MD, PhD | <a href="mailto:lars.mehlum@medisin.uio.no">lars.mehlum@medisin.uio.no</a>                                 | National Centre for Suicide Research and Prevention, Institute of Clinical Medicine, University of Oslo, Oslo, Norway |                                                                                                                                                                      |
| Prof | Matthew Miller            | MD, ScD | <a href="mailto:ma.miller@neu.edu">ma.miller@neu.edu</a>                                                   | Bouvé College of Health Sciences, Northeastern University, 360 Huntington Avenue Boston, MA 02115 USA                 | Harvard School of Public Health                                                                                                                                      |
| Prof | Ellenor Mittendorfer-Rutz | PhD     | <a href="mailto:ellenor.mittendorfer-rutz@ki.se">ellenor.mittendorfer-rutz@ki.se</a>                       | Karolinska Institute, Department of Clinical Neuroscienc, Division of Insurance Medicine, Stockholm, Sweden           |                                                                                                                                                                      |
| Prof | Paul Moran                | MD      | <a href="mailto:paul.moran@bristol.ac.uk">paul.moran@bristol.ac.uk</a>                                     | Population Health Sciences, Bristol Medical School, University of Bristol, Oakfield House, Bristol, BS8 2BN, UK       | National Institute of Health Research Biomedical Research Centre at the University Hospitals Bristol NHS Foundation Trust and the University of Bristol, Bristol, UK |
|      | Jacqui Morrissey          | MSc     | <a href="mailto:J.Morrissey@samaritans.org">J.Morrissey@samaritans.org</a>                                 | Samaritans, The Upper Mill, Kingston Road, Ewell, Surrey, KT17 2AF, UK                                                |                                                                                                                                                                      |
| Dr   | Christine Moutier         | MD      | <a href="mailto:CMoutier@afsp.org">CMoutier@afsp.org</a>                                                   | American Foundation for Suicide Prevention, 199 Water Street, 11th Floor, New York, NY 10038, USA                     |                                                                                                                                                                      |
| Prof | Thomas Niederkrotenthaler | MD, PhD | <a href="mailto:thomas.niederkrotenthaler@meduniwien.ac.at">thomas.niederkrotenthaler@meduniwien.ac.at</a> | Unit Suicide Research and Mental Health Promotion, Department of Social and                                           | Wiener Werkstaette for Suicide Research, Vienna, Austria                                                                                                             |

|      |                     |         |                                                                                    |                                                                                                                                           |                                                                                                                        |
|------|---------------------|---------|------------------------------------------------------------------------------------|-------------------------------------------------------------------------------------------------------------------------------------------|------------------------------------------------------------------------------------------------------------------------|
|      |                     |         |                                                                                    | Preventive Medicine, Centre for Public Health, Medical University of Vienna, Kinderspitalgasse 15, A-1090 Vienna, Austria                 |                                                                                                                        |
|      | Emma Nielsen        |         | <a href="mailto:Emma.Nielsen@nottingham.ac.uk">Emma.Nielsen@nottingham.ac.uk</a>   | Self-Harm Research Group, School of Psychology, University of Nottingham, University Park, Nottingham, NG7 2RD UK                         |                                                                                                                        |
| Prof | Merete Nordentoft   | PhD     | <a href="mailto:Merete.Nordentoft@regionh.dk">Merete.Nordentoft@regionh.dk</a>     | Danish Research Institute for Suicide Prevention, Mental Health Centre Copenhagen, Copenhagen, Denmark.                                   | Institute of Clinical Medicine, Faculty of Health and Medical Sciences, University of Copenhagen, Copenhagen, Denmark. |
| Prof | Rory O'Connor       | PhD     | <a href="mailto:Rory.OConnor@glasgow.ac.uk">Rory.OConnor@glasgow.ac.uk</a>         | Suicidal Behaviour Research Laboratory, Institute of Health & Wellbeing, University of Glasgow, 1055 Great Western Road, Glasgow, G12 0XH |                                                                                                                        |
| Prof | Siobhan O'Neill     | PhD     | <a href="mailto:sm.oneill@ulster.ac.uk">sm.oneill@ulster.ac.uk</a>                 | School of Psychology, Ulster University, Cromore Road, Coleraine, Co. Londonderry, BT52 1SA                                               |                                                                                                                        |
| Prof | Maria Oquendo       | MD, PhD | <a href="mailto:moquendo@penmedicine.upenn.edu">moquendo@penmedicine.upenn.edu</a> | Department of Psychiatry, University of Pennsylvania, US                                                                                  |                                                                                                                        |
| Prof | Joseph Osafo        | PhD     | <a href="mailto:josaforo@gmail.com">josaforo@gmail.com</a>                         | Department of Psychology, University of Ghana                                                                                             | Executive Director: Centre for Suicide and Violence Research, Ghana                                                    |
| Prof | Andrew Page         | PhD     | <a href="mailto:a.page@westernsydney.edu.au">a.page@westernsydney.edu.au</a>       | Translational Health Research Institute, Western Sydney University, Penrith NSW 2571, Australia                                           |                                                                                                                        |
| Prof | Michael R. Phillips | MD, MPH | <a href="mailto:mphillipschina@outlook.com">mphillipschina@outlook.com</a>         | Suicide Research and Prevention Center, Shanghai Mental Health Center, Shanghai Jiao                                                      | Departments of Psychiatry and Epidemiology, Columbia University, USA                                                   |

|      |                   |         |                                                                                |                                                                                                                                                                             |  |
|------|-------------------|---------|--------------------------------------------------------------------------------|-----------------------------------------------------------------------------------------------------------------------------------------------------------------------------|--|
|      |                   |         |                                                                                | Tong University School of Medicine                                                                                                                                          |  |
| Prof | Jane Pirkis       | PhD     | <a href="mailto:j.pirkis@unimelb.edu.au">j.pirkis@unimelb.edu.au</a>           | Melbourne School of Population and Global Health, University of Melbourne, VIC, Australia                                                                                   |  |
| Prof | Steve Platt       | FACSS   | <a href="mailto:Steve.Platt@ed.ac.uk">Steve.Platt@ed.ac.uk</a>                 | Usher Institute, College of Medicine and Veterinary Medicine, University of Edinburgh                                                                                       |  |
| Prof | Boris Polozhy     | MD      | <a href="mailto:pbs.moscow@gmail.com">pbs.moscow@gmail.com</a>                 | Director, Department of Ecological and Social Problems of Mental Health at the Serbsky Research Center for Social and Forensic Psychiatry, Moscow, Russia.                  |  |
| Prof | Maurizio Pompili  | PhD     | <a href="mailto:maurizio.pompili@uniroma1.it">maurizio.pompili@uniroma1.it</a> | Department of Neurosciences, Mental Health and Sensory Organs, Suicide Prevention Center, Sant'Andrea Hospital, Sapienza University of Rome, Rome 00189, Italy              |  |
| Prof | Ping Qin          | PhD     | <a href="mailto:ping.qin@medisin.uio.no">ping.qin@medisin.uio.no</a>           | National Centre for Suicide Research and Prevention, Institute of Clinical Medicine, University of Oslo, Oslo, Norway                                                       |  |
| Dr   | Thilini Rajapakse | MD, PhD | <a href="mailto:gemba471@gmail.com">gemba471@gmail.com</a>                     | Dept of Psychiatry, Faculty of Medicine, University of Peradeniya, Sri Lanka.                                                                                               |  |
| Prof | Mohsen Rezaeian   | PhD     | <a href="mailto:moeygmr2@yahoo.co.uk">moeygmr2@yahoo.co.uk</a>                 | Epidemiology and Biostatistics Department, Occupational Environmental Research Center, Rafsanjan Medical School, Rafsanjan University of Medical Sciences, Rafsanjan, Iran. |  |

|      |                     |        |                                                                                      |                                                                                                                                                       |                                                                                                      |
|------|---------------------|--------|--------------------------------------------------------------------------------------|-------------------------------------------------------------------------------------------------------------------------------------------------------|------------------------------------------------------------------------------------------------------|
| Prof | Barbara Schneider   | MD     | <a href="mailto:b.schneider@em.uni-frankfurt.de">b.schneider@em.uni-frankfurt.de</a> | Department of Psychiatry, Psychotherapy and Psychosomatic Medicine, University of Frankfurt/Main & Lead National Suicide Prevention Strategy, Germany |                                                                                                      |
| Dr   | Morton Silverman    | MD     | <a href="mailto:mms1947@gmail.com">mms1947@gmail.com</a>                             | Department of Behavioral Medicine and Psychiatry, Medical College of Wisconsin, Madison, Wisconsin, USA                                               |                                                                                                      |
| Dr   | Mark Sinyor         | MD     | <a href="mailto:mark.sinyor@sunnybrook.ca">mark.sinyor@sunnybrook.ca</a>             | Department of Psychiatry, Sunnybrook Health Sciences Centre, Toronto, Ontario, Canada                                                                 | Department of Psychiatry, University of Toronto, Toronto, Ontario, Canada                            |
| Prof | Steven Stack        | PhD    | <a href="mailto:aa1051@wayne.edu">aa1051@wayne.edu</a>                               | Department of Criminal Justice, Wayne State University, Detroit, Michigan, USA                                                                        | Department of Psychiatry and Behavioral Neuroscience, Wayne State University, Detroit, Michigan, USA |
| Prof | Ellen Townsend      | PhD    | <a href="mailto:Ellen.Townsend@nottingham.ac.uk">Ellen.Townsend@nottingham.ac.uk</a> | Self-Harm Research Group, School of Psychology, University of Nottingham, University Park, Nottingham, NG7 2RD UK                                     |                                                                                                      |
| Dr   | Gustavo Turecki     | MD PhD | <a href="mailto:gustavo.turecki@mcgill.ca">gustavo.turecki@mcgill.ca</a>             | McGill Group for Suicide Studies, Department of Psychiatry, McGill University, Douglas Mental Health University Institute, Montreal, Quebec, Canada.  |                                                                                                      |
| Prof | Michiko Ueda        | PhD    | <a href="mailto:mueda@waseda.jp">mueda@waseda.jp</a>                                 | Faculty of Political Science and Economics, Waseda University, Building No.3 1-6-1 Nishiwaseda, Shinjuku-ku, Tokyo 169-8050, Japan                    |                                                                                                      |
| Dr   | Lakshmi Vijayakumar | PhD    | <a href="mailto:lakshmi@vijayakumars.com">lakshmi@vijayakumars.com</a>               | Department of Psychiatry, Voluntary Health Service, SNEHA, Chennai, Tamil Nadu, India                                                                 |                                                                                                      |

|      |             |     |                                                                      |                                                                                                                                                 |  |
|------|-------------|-----|----------------------------------------------------------------------|-------------------------------------------------------------------------------------------------------------------------------------------------|--|
| Prof | Paul Yip    | Phd | <a href="mailto:sfpyip@hku.hk">sfpyip@hku.hk</a>                     | HKJC Centre for Suicide Research and Prevention, Department of Social Work and Social Administration, The University of Hong Kong               |  |
| Prof | Gil Zalsman | MD  | <a href="mailto:zalsman@tauex.tau.ac.il">zalsman@tauex.tau.ac.il</a> | Sackler Faculty of Medicine, Tel Aviv University, Geha Mental Health Center, Israel and Department of Psychiatry, Columbia University, NY, USA. |  |
